# Supplementary figures and images for: Human ORC/MCM density is low in active genes and correlates with replication time but does not delimit initiation zones
Source: eLife journal article supplement (doi:10.7554/elife.62161), 2021-03-08

**a**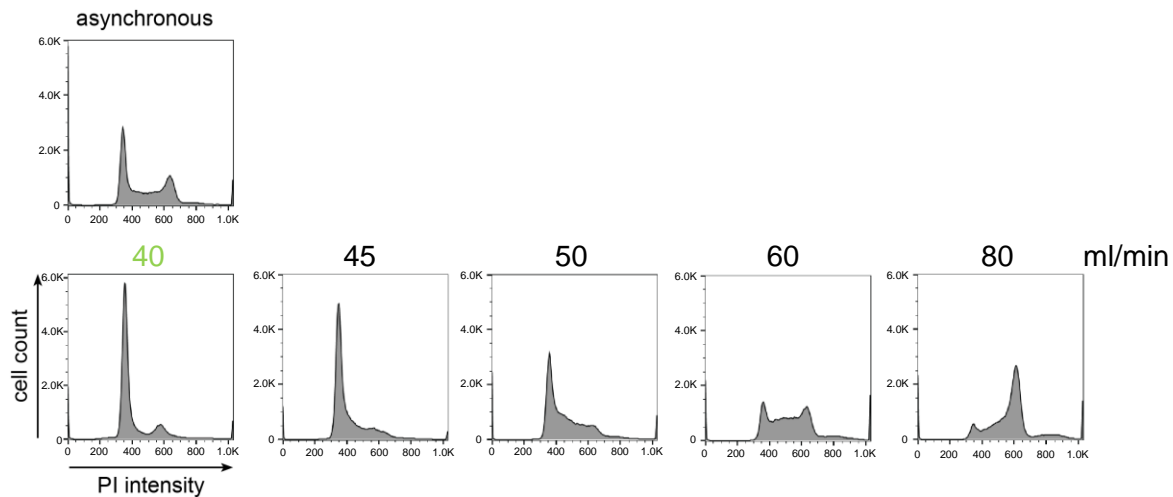**b**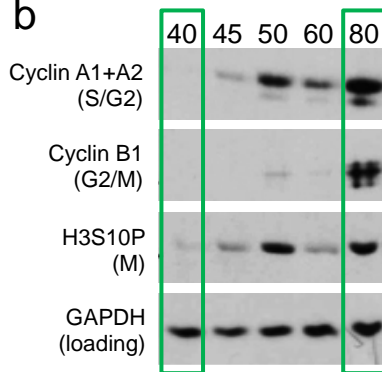**c**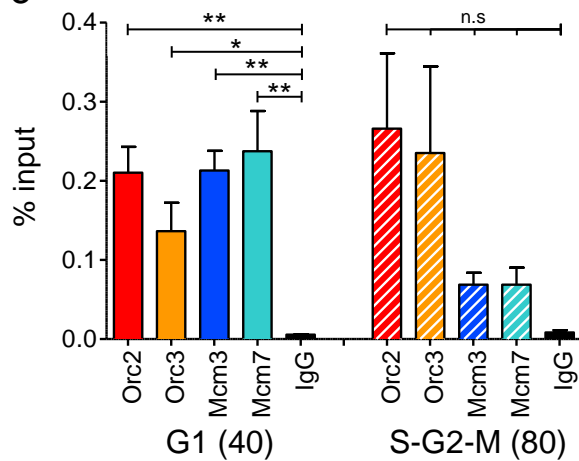

Supplement: supp [file elife_poa_e62161_Figure_1_figure_supplement_1.pdf › elife_poa_e62161_Figure_1_figure_supplement_1.pdf]

a

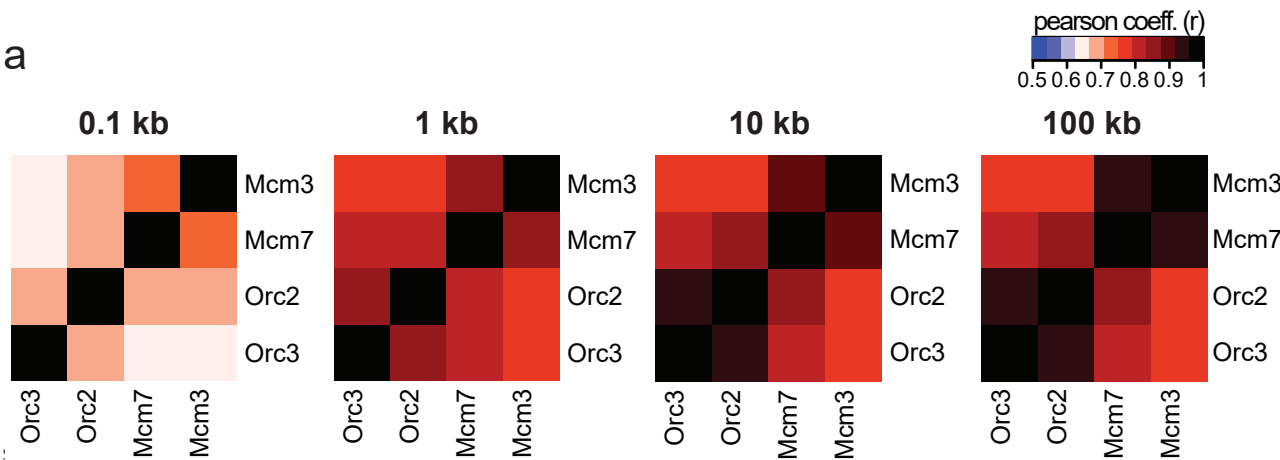

b

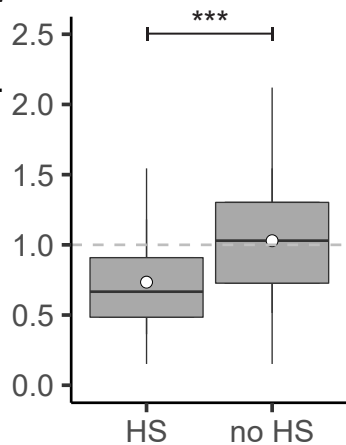

c

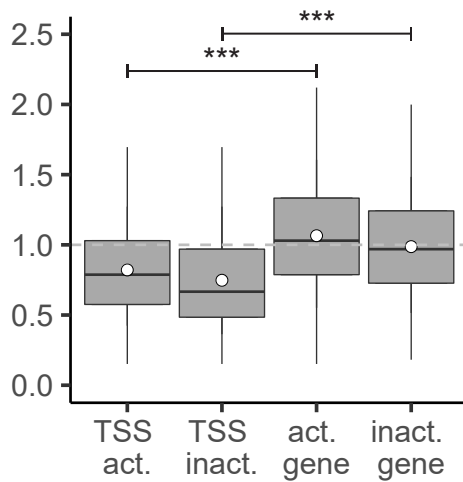

d

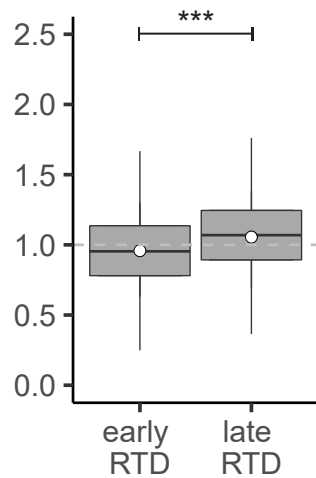

Supplement: supp [file elife_poa_e62161_Figure_1_figure_supplement_2.pdf › elife_poa_e62161_Figure_1_figure_supplement_2.pdf]

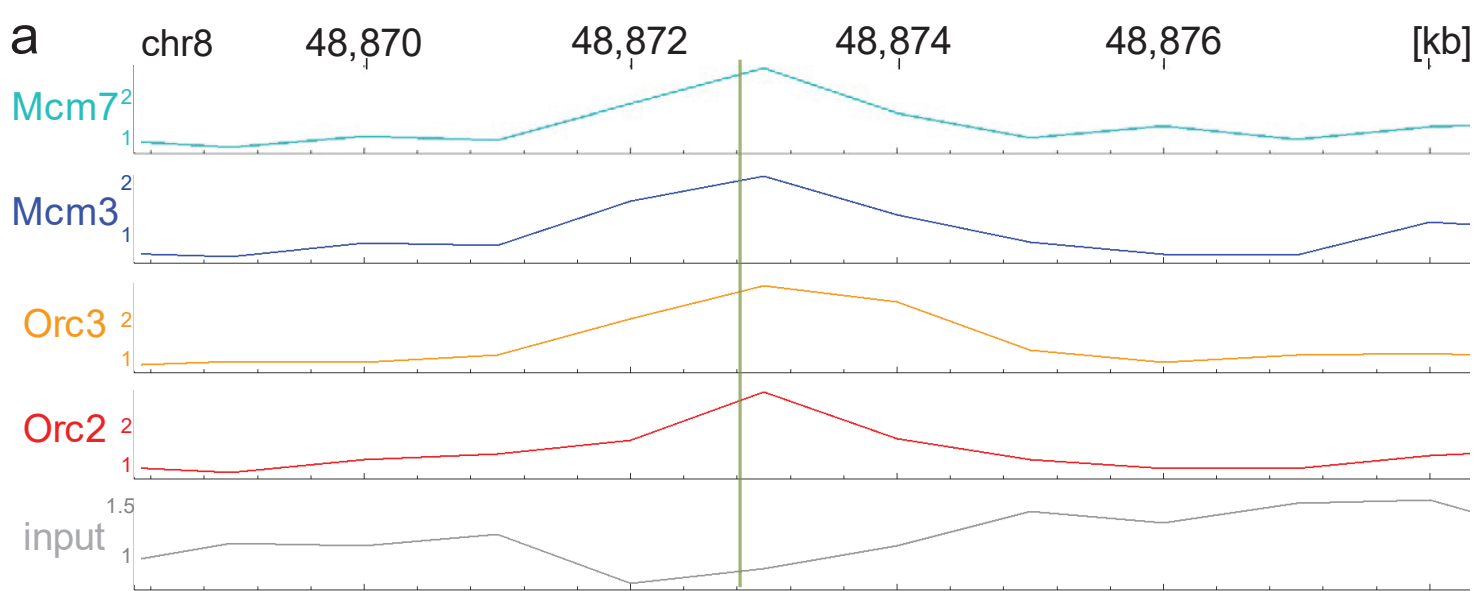

**b**

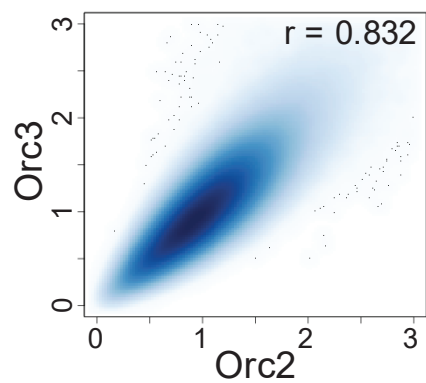

**c**

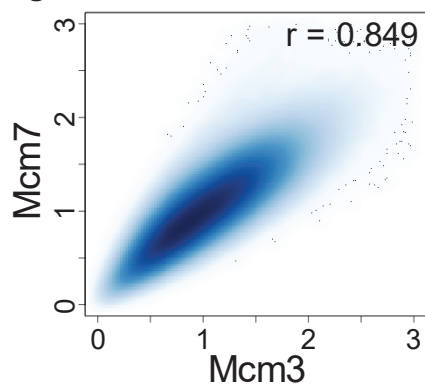

**d**

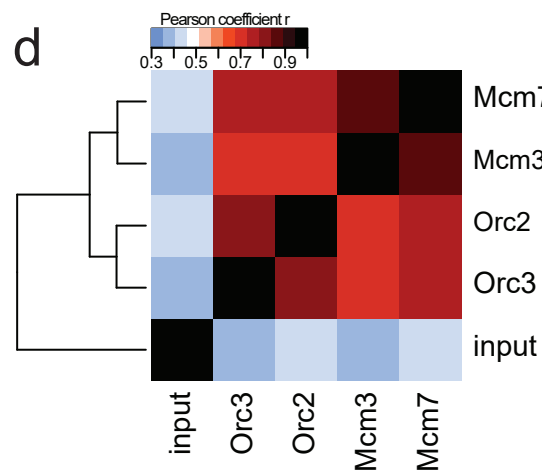

**e**

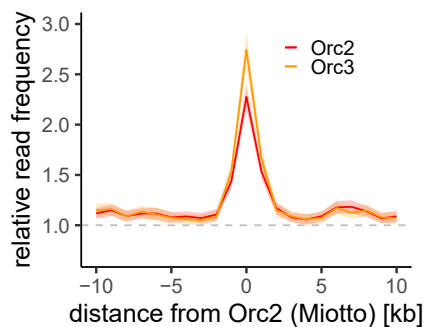

**f**

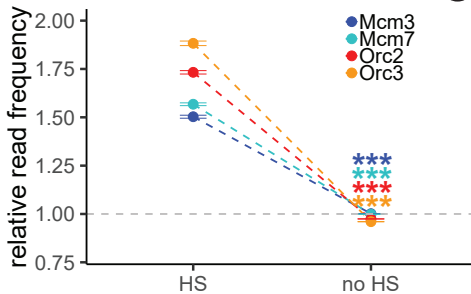

**g**

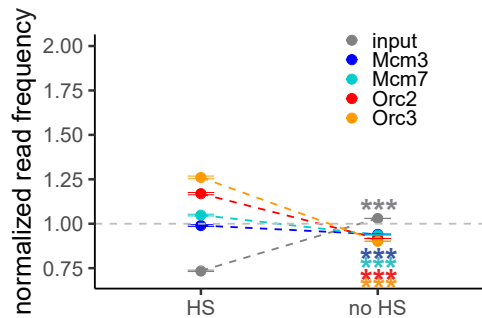

Supplement: supp [file elife_poa_e62161_Figure_1_figure_supplement_3.pdf › elife_poa_e62161_Figure_1_figure_supplement_3.pdf]

**a**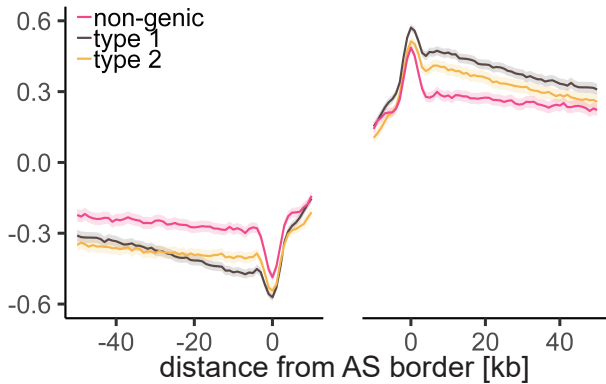**b**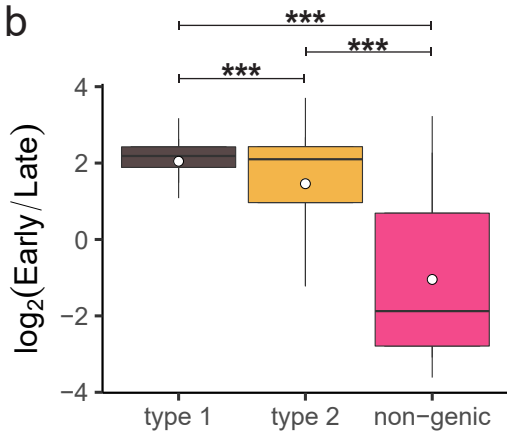

Supplement: supp [file elife_poa_e62161_Figure_2_figure_supplement_1.pdf › elife_poa_e62161_Figure_2_figure_supplement_1.pdf]

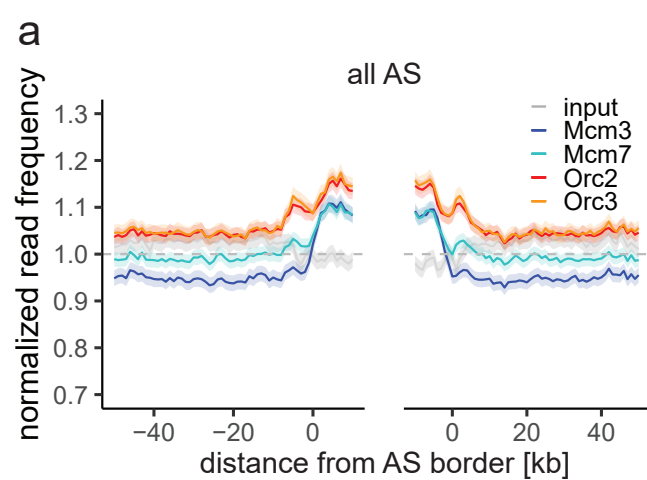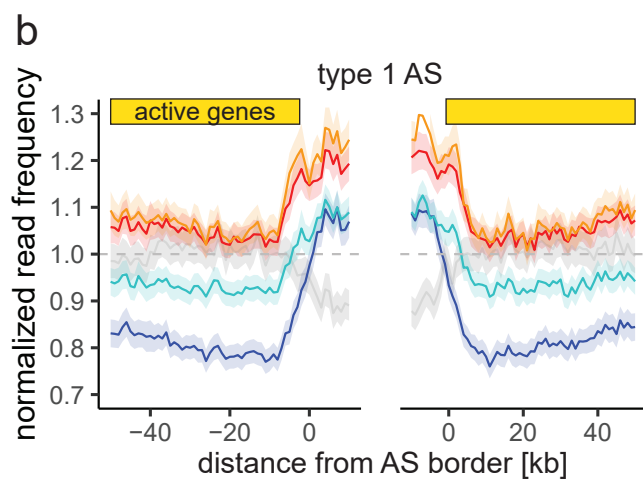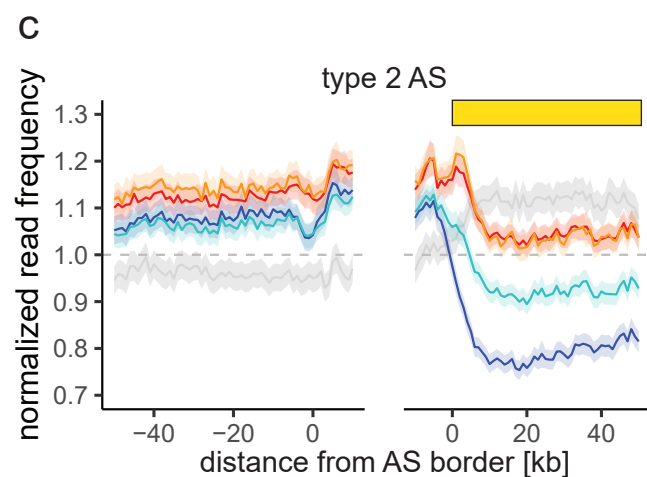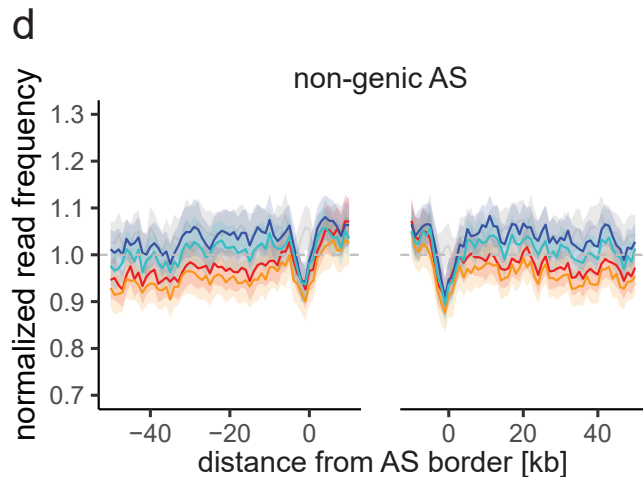

Supplement: supp [file elife_poa_e62161_Figure_2_figure_supplement_2.pdf › elife_poa_e62161_Figure_2_figure_supplement_2.pdf]

**a**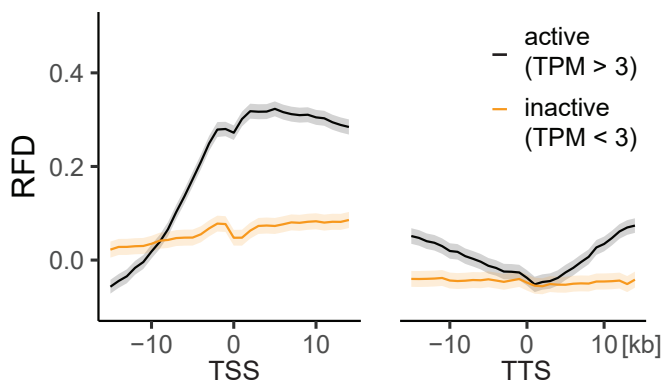**b**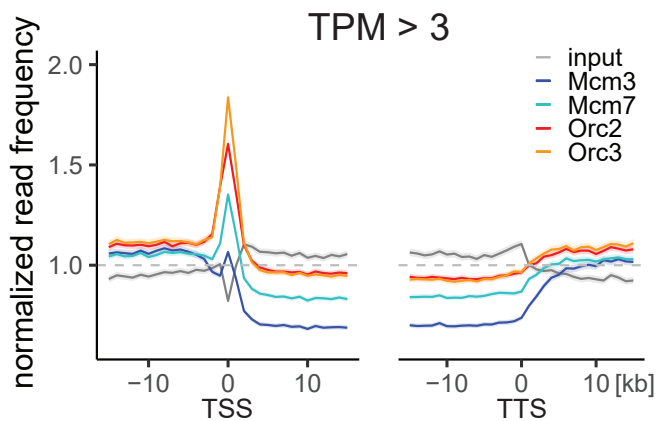**c**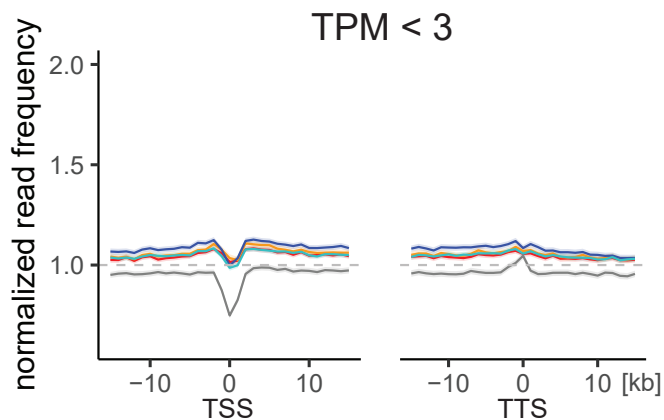**d**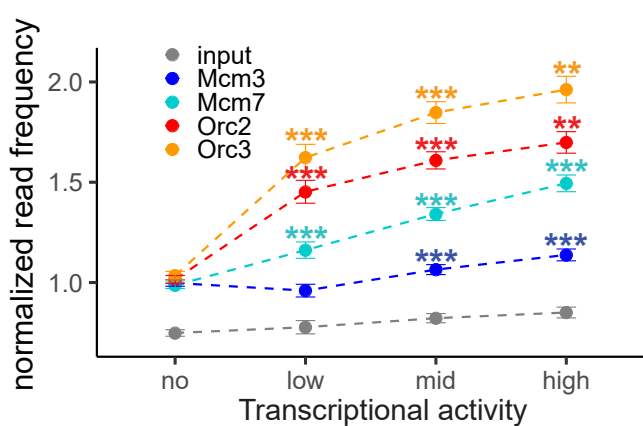**e**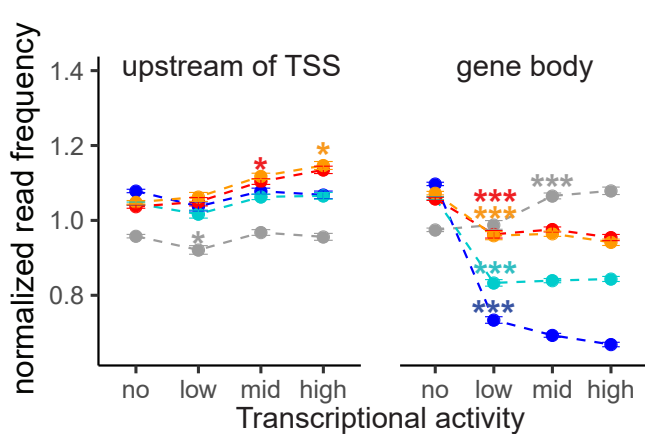

Supplement: supp [file elife_poa_e62161_Figure_3_figure_supplement_1.pdf › elife_poa_e62161_Figure_3_figure_supplement_1.pdf]

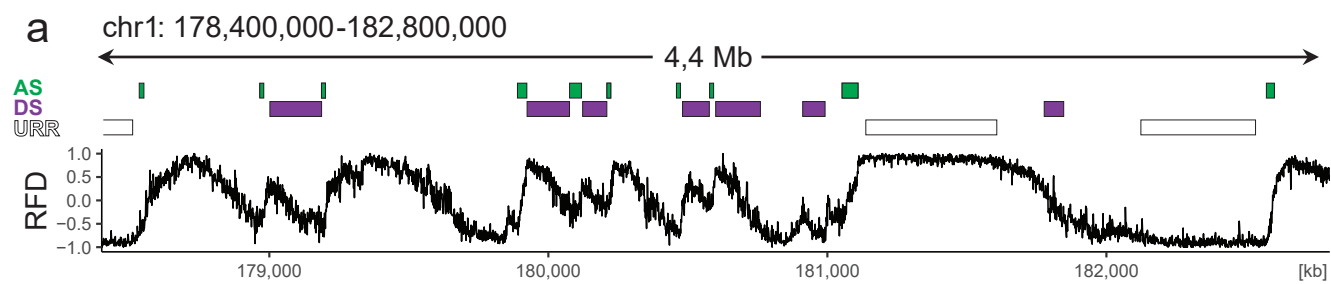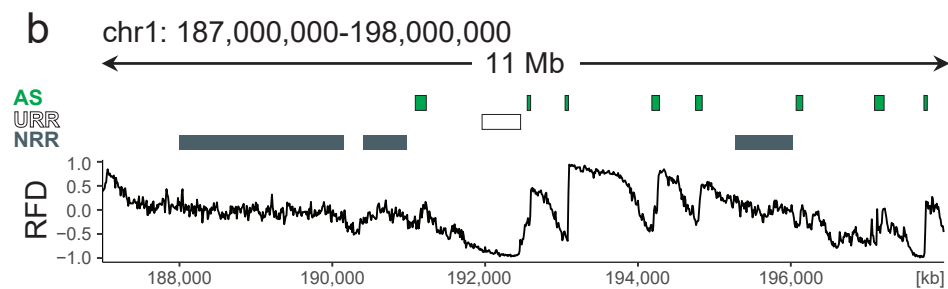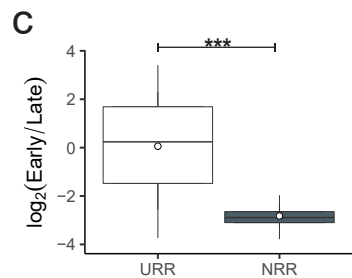

column normalized ChIP frequency

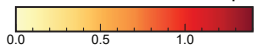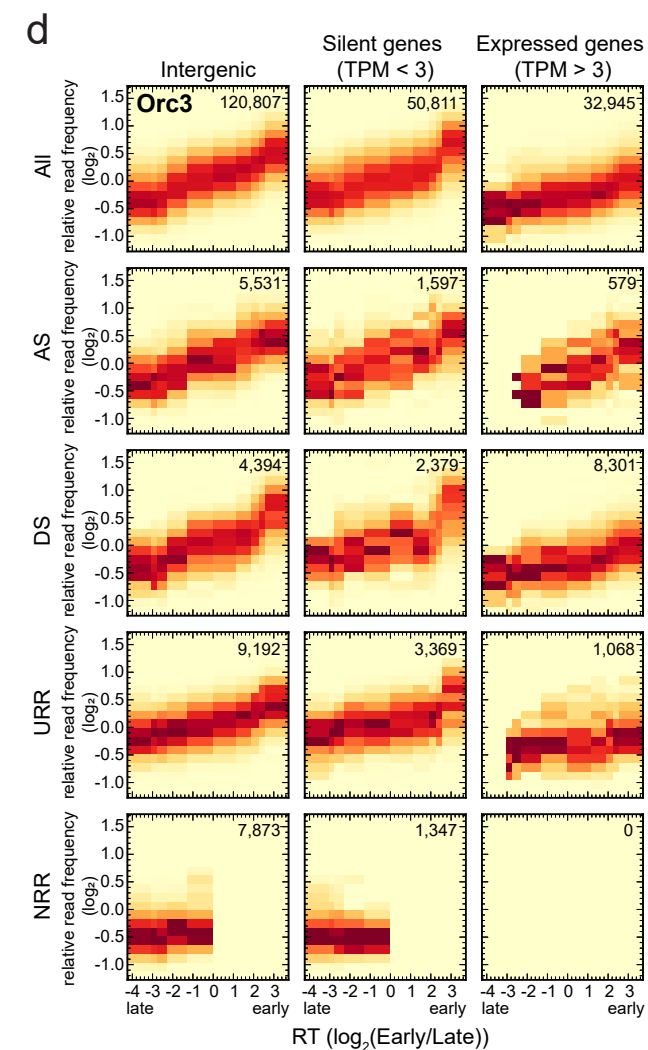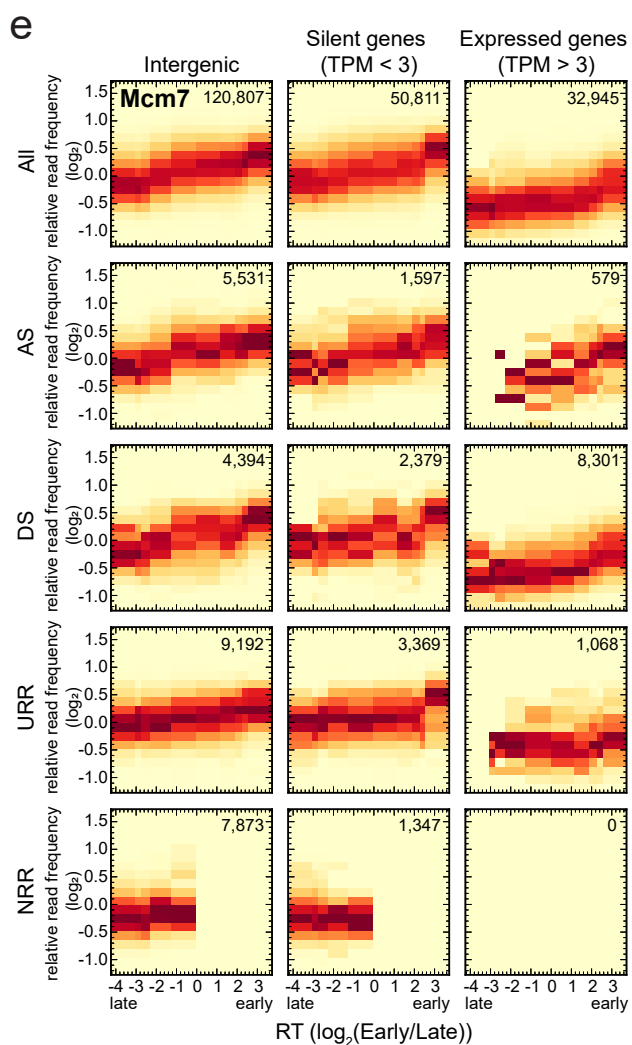

Supplement: supp [file elife_poa_e62161_Figure_4_figure_supplement_1.pdf › elife_poa_e62161_Figure_4_figure_supplement_1.pdf]

**a**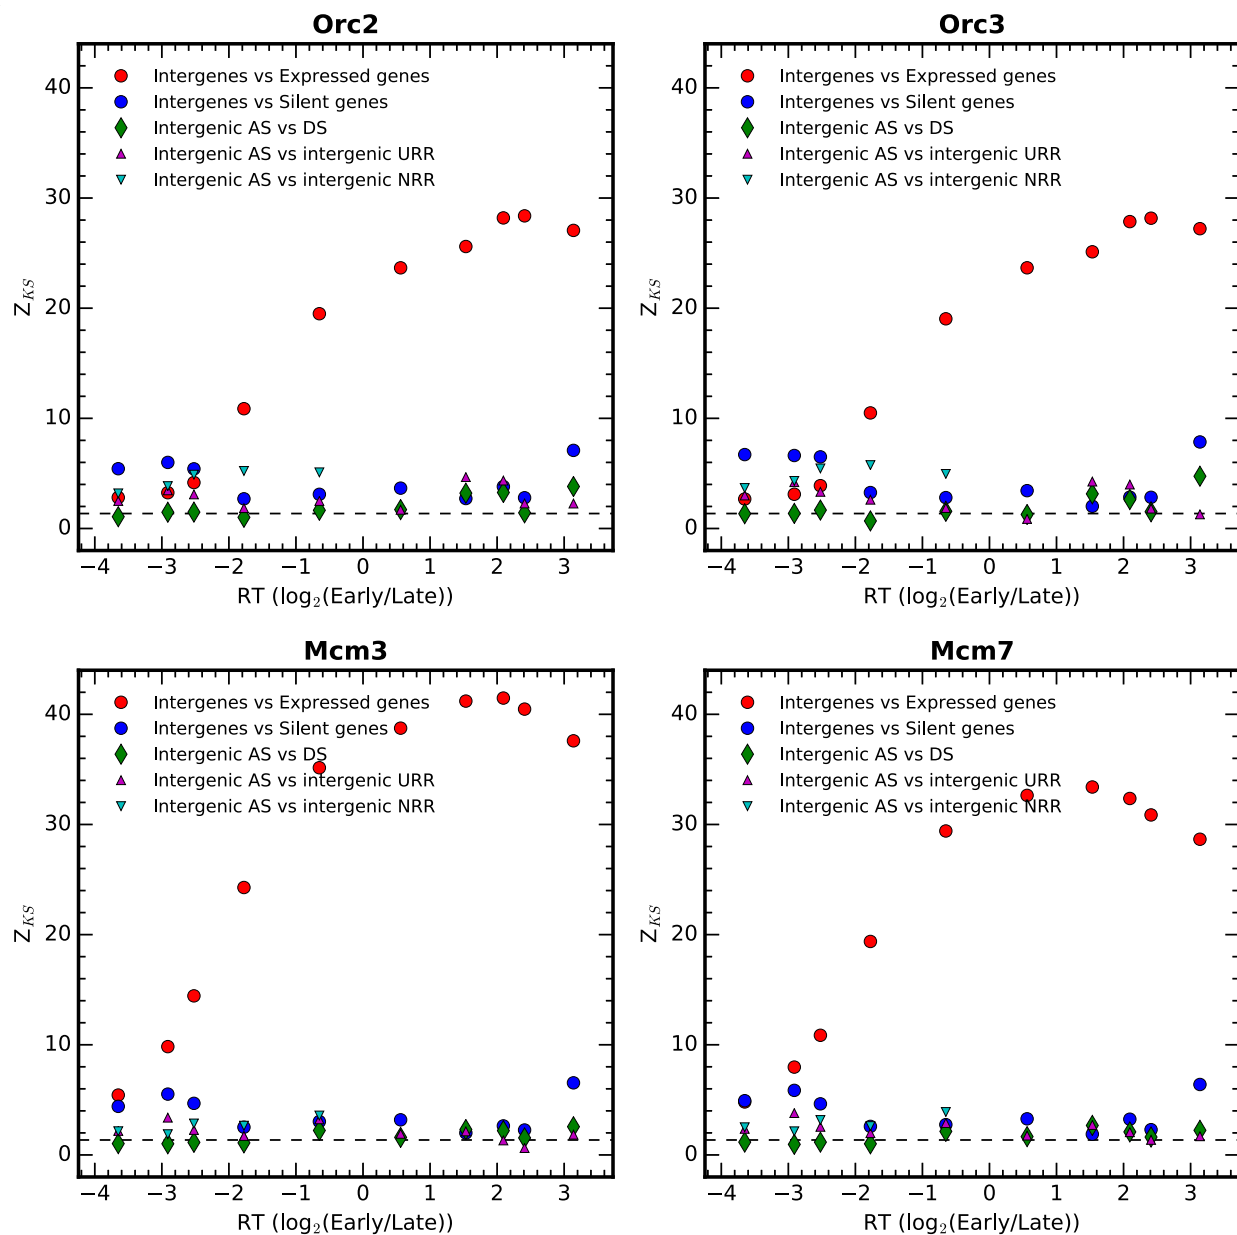**b**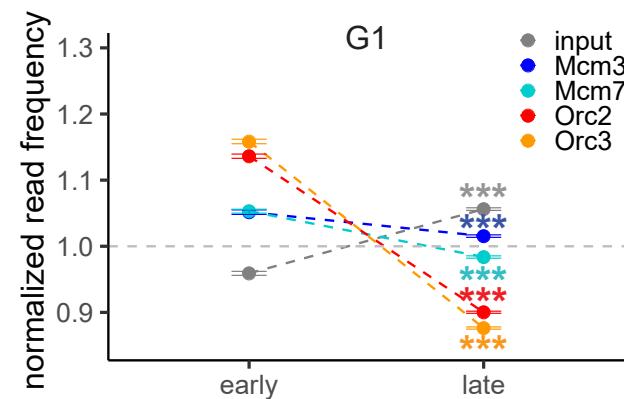**c**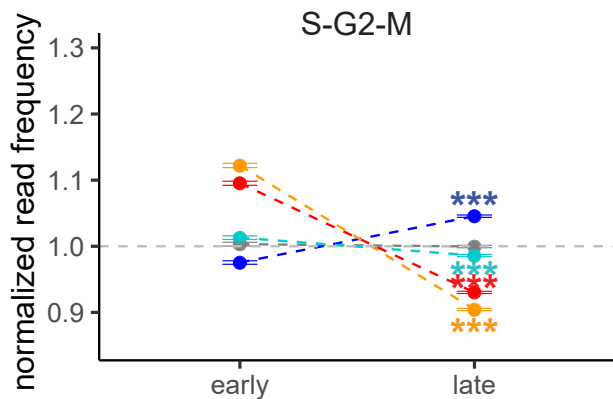

Supplement: supp [file elife_poa_e62161_Figure_4_figure_supplement_2.pdf › elife_poa_e62161_Figure_4_figure_supplement_2.pdf]

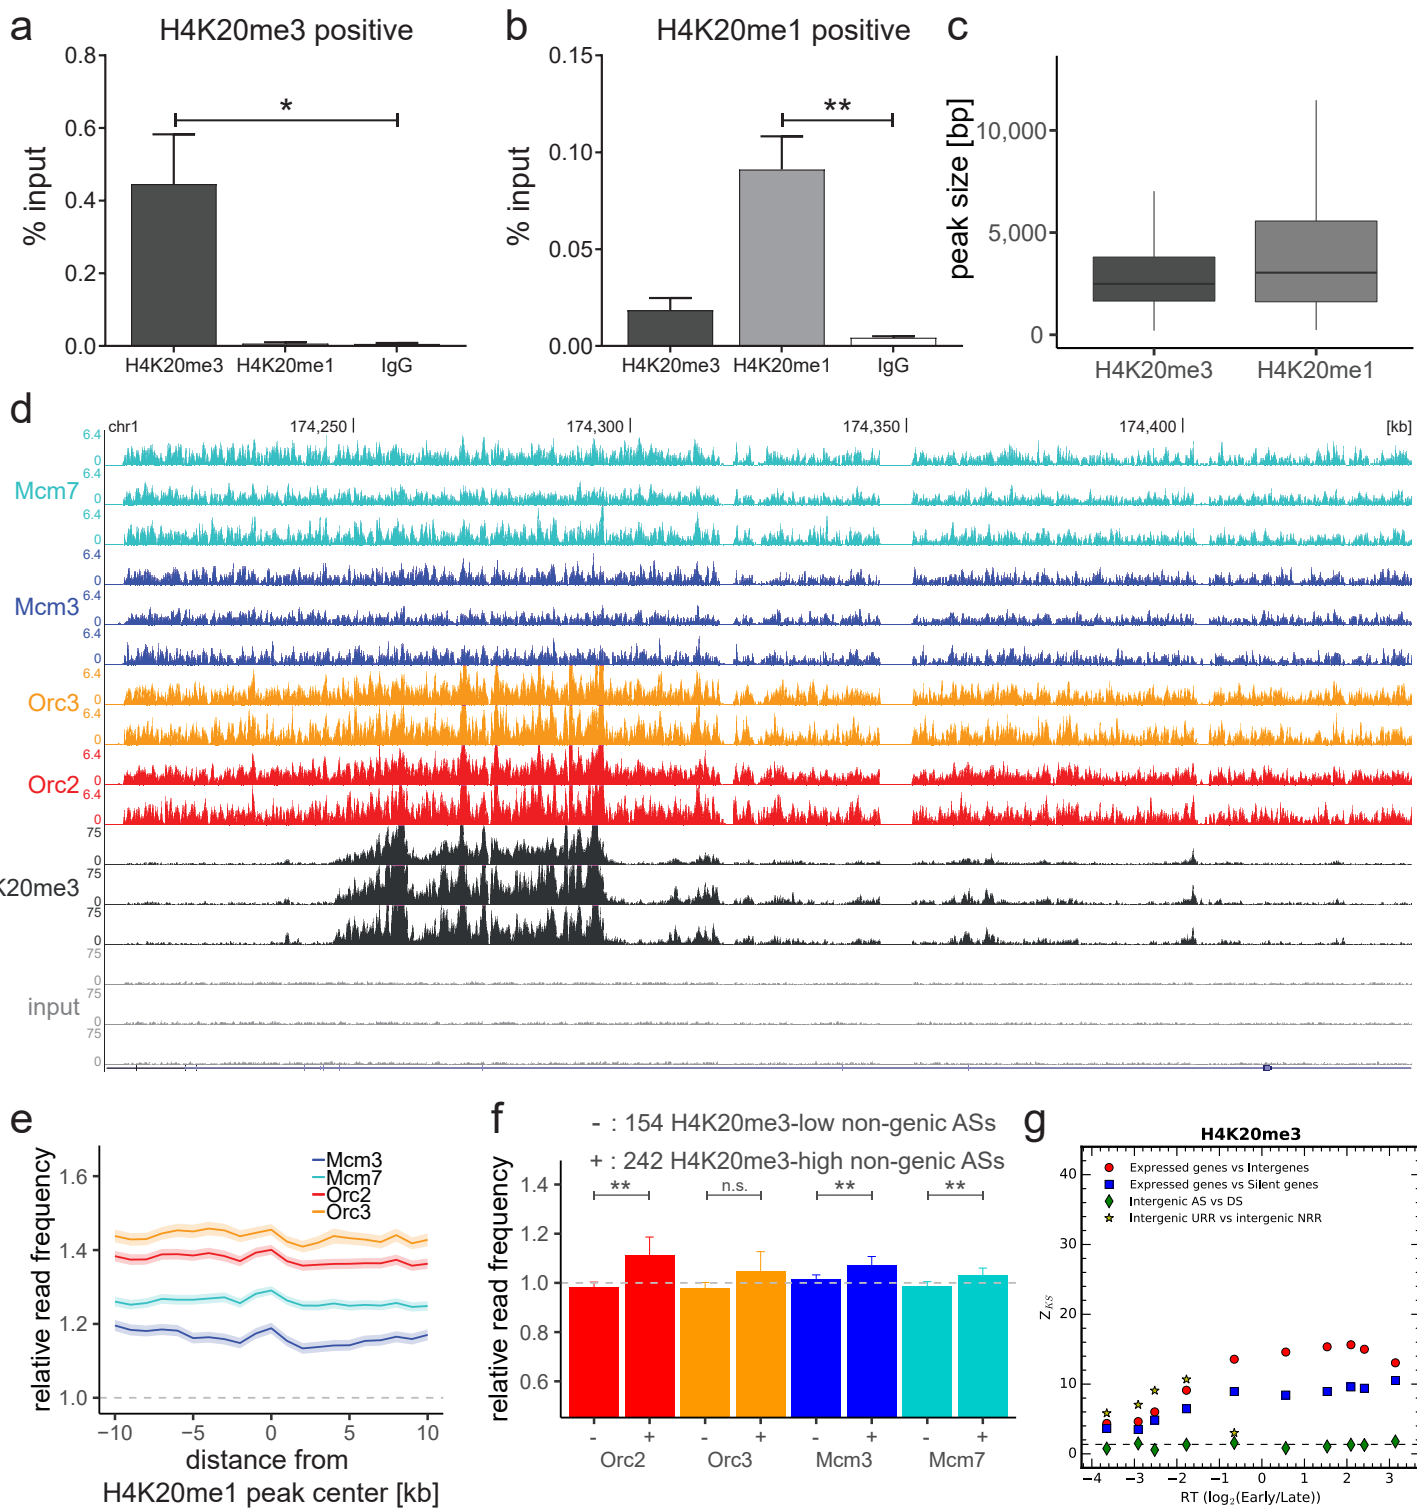

Supplement: supp [file elife_poa_e62161_Figure_5_figure_supplement_1.pdf › elife_poa_e62161_Figure_5_figure_supplement_1.pdf]

a

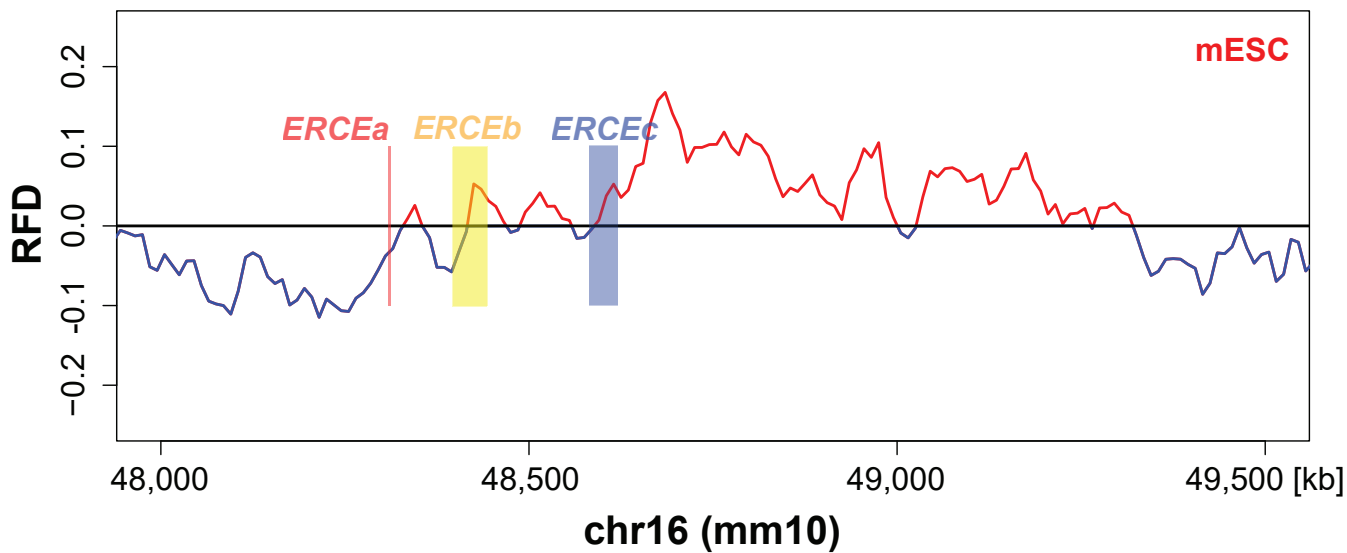

b

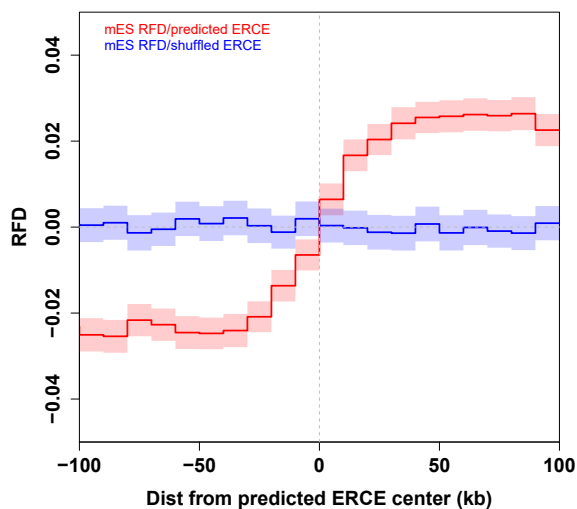

c

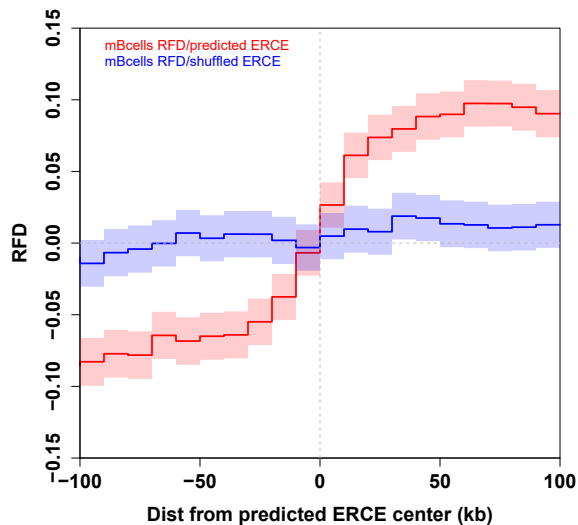

Supplement: supp [file elife_poa_e62161_Figure_7_figure_supplement_1.pdf › elife_poa_e62161_Figure_7_figure_supplement_1.pdf]
